# Supplementary material for: Quality of Life after Deep Brain Stimulation in Parkinson's Disease: Does the Target Matter?
Source: PubMed Central journal article supplement (PMC11542293; doi:10.1002/mdc3.14199), 2024-09-03

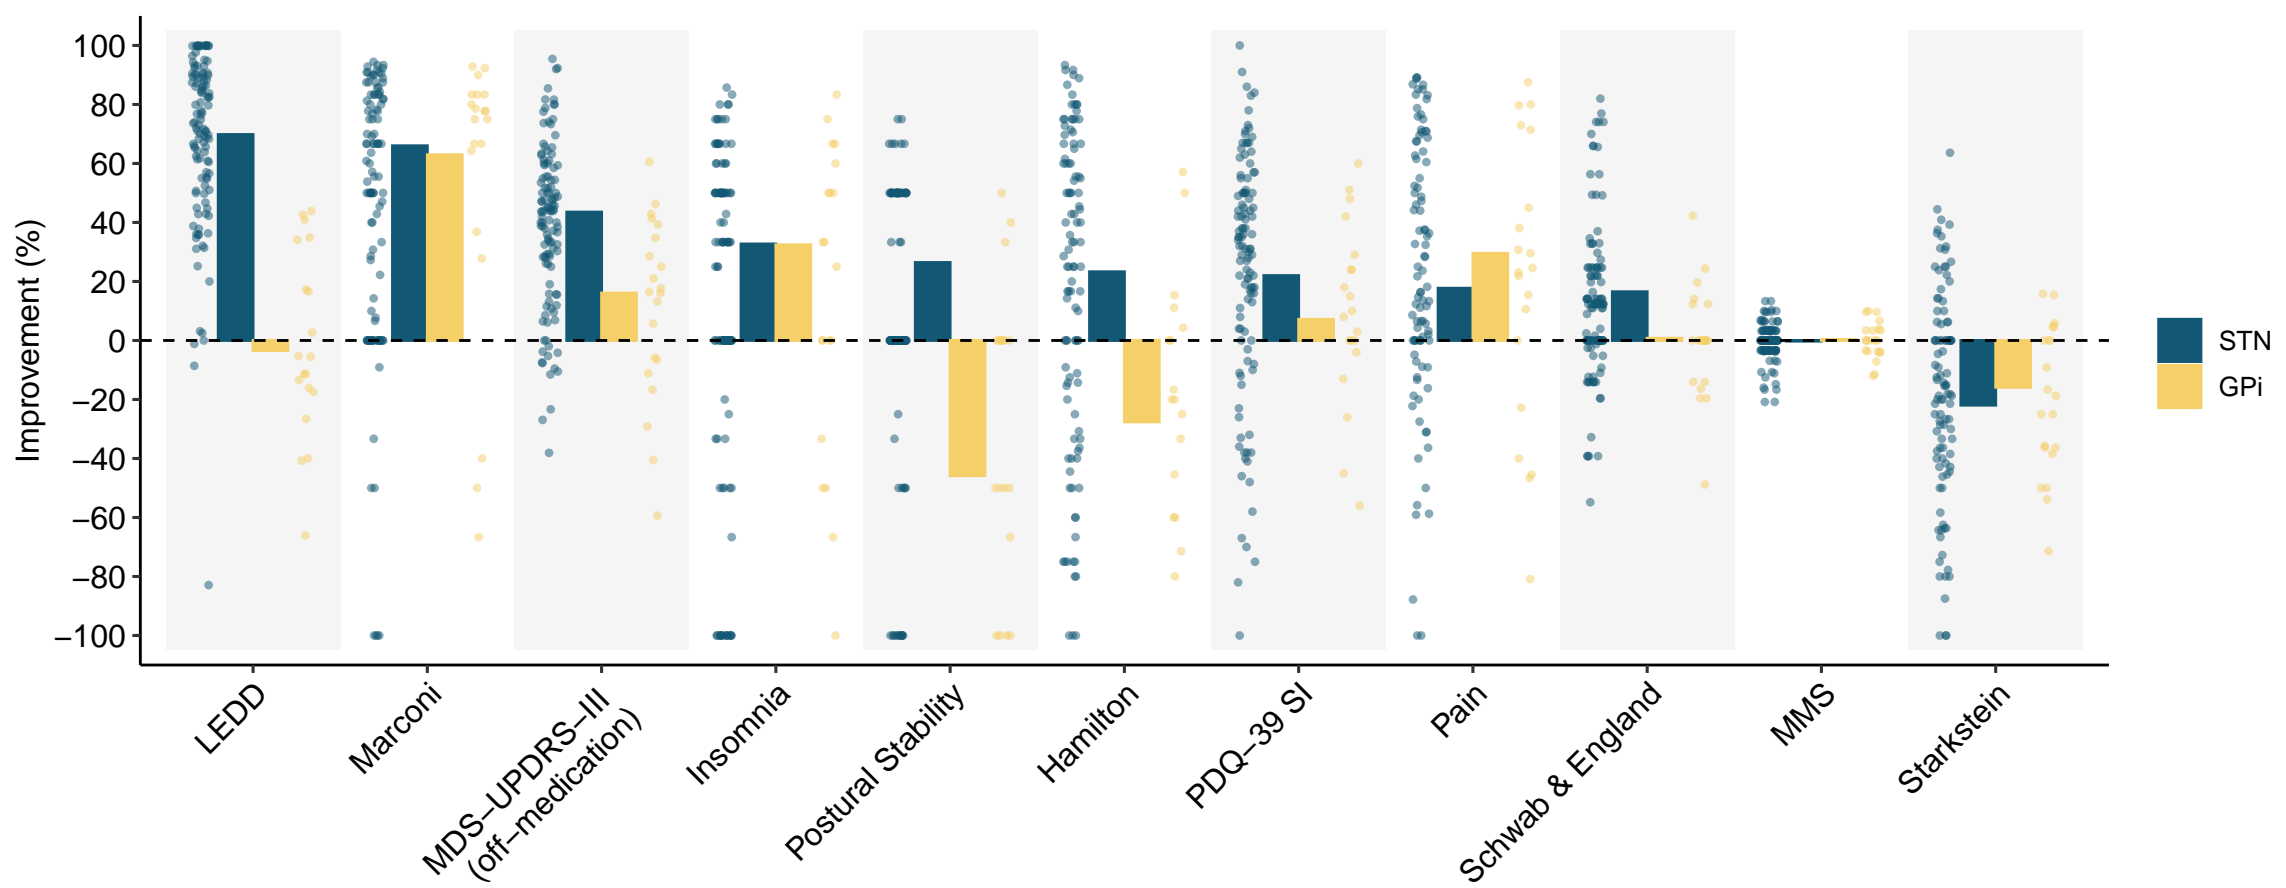

Supplement: MDC3-11-1379-s001.pdf [file MDC3-11-1379-s001.pdf]
